# Supplementary material
Source: publisher figshare collection journal article supplement (https://acs.figshare.com/ndownloader/files/21773484)
Supplement: Supplementary file 1 [file 21773484]

**Comprehensive research on the influence of non-lignocellulosic components on the  
pyrolysis behavior of Chinese distiller's grain**

Wei Qi<sup>1\*</sup>, Wei Yang<sup>1,2</sup>, Qing Xu<sup>2</sup>, Zihan Xu<sup>1,3</sup>, Qiong Wang<sup>1\*</sup>, Cuiyi Liang<sup>1</sup>, Shuna Liu<sup>1</sup>,  
Changming Ling<sup>2</sup>, Zhongming Wang<sup>1</sup>, Zhenhong Yuan<sup>1</sup>

<sup>1</sup>Guangzhou Institute of Energy Conversion, Chinese Academy of Sciences, CAS Key  
Laboratory of Renewable Energy, Guangdong Provincial Key Laboratory of New and  
Renewable Energy Research and Development, Guangzhou 510640, China;

<sup>2</sup>School of Mechanical and Power Engineering, Guangdong Ocean University, Zhanjiang  
524000, China; Shenzhen Institute of Guangdong Ocean University, Shenzhen 518108,  
China;

<sup>3</sup>University of Chinese Academy of Sciences, Beijing, 100039, China.

\*Corresponding author:

Wei Qi, qiwei@ms.giec.ac.cn

Qiong Wang, wangqiong@ms.giec.ac.cn

Number of Pages: 2

Number of Tables: 1

Table S1 Proximate, elemental and Component analyses of EDG

| Ultimate analysis (%) |       | Proximate analysis (%)    |      |
|-----------------------|-------|---------------------------|------|
| C                     | 48.82 | Volatile                  | 71.0 |
| H                     | 5.85  | Fixed carbon <sup>a</sup> | 19.3 |
| N                     | 3.90  | Water                     | 4.04 |
|                       |       | Ash                       | 5.63 |

<sup>a</sup>Calculated by difference (fixed carbon=100-moisture-ash-volatiles). Every analysis was mass fraction and based on the dry basis.
